# Supplementary material
Source: MDPI journal article supplement (https://www.mdpi.com/2071-1050/15/1/399)
Supplement: s1 [file s1]

## Supplementary Information for

### Electric car market analysis using open data: sales, sustainability assessment, and forecasting

Dmitry V. Pelegov <sup>1,\*</sup>, Jean-Jacques Chanaron <sup>2</sup>

1 = Institute of Natural Sciences and Mathematics, Ural Federal University,  
19 Mira street, 620002 Ekaterinburg, Russia;  
ORCID: 0000-0002-0274-2572

\* = Corresponding author Dmitry V. Pelegov, [dmitry.pelegov@urfu.ru](mailto:dmitry.pelegov@urfu.ru)

2 = Grenoble Ecole de Management, 12 rue Pierre Sémard, 38000 Grenoble, France;  
ORCID: 0000-0001-9559-6377

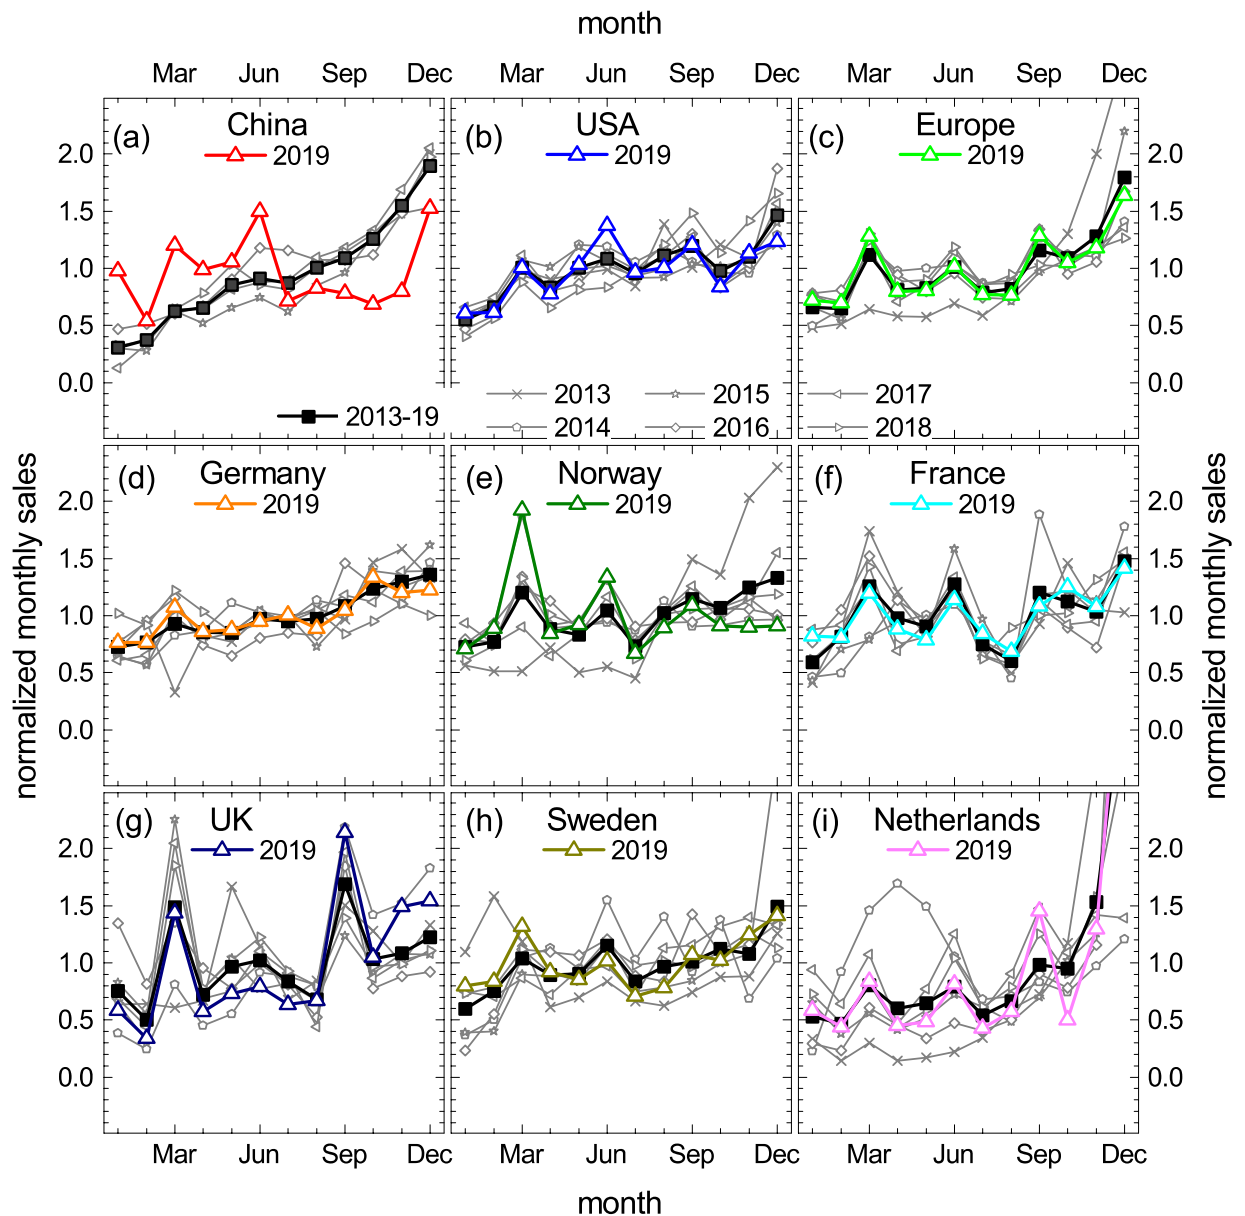

Fig. S1 Normalized monthly EV sales in (a) China, (b) USA, (c) Europe, (d) Germany, (e) Norway, (f) France, (g) UK, (h) Sweden and (i) Netherlands. Filled black square line corresponds to

averaging over previous years (excluding 2019 for China and 2020 for the others).

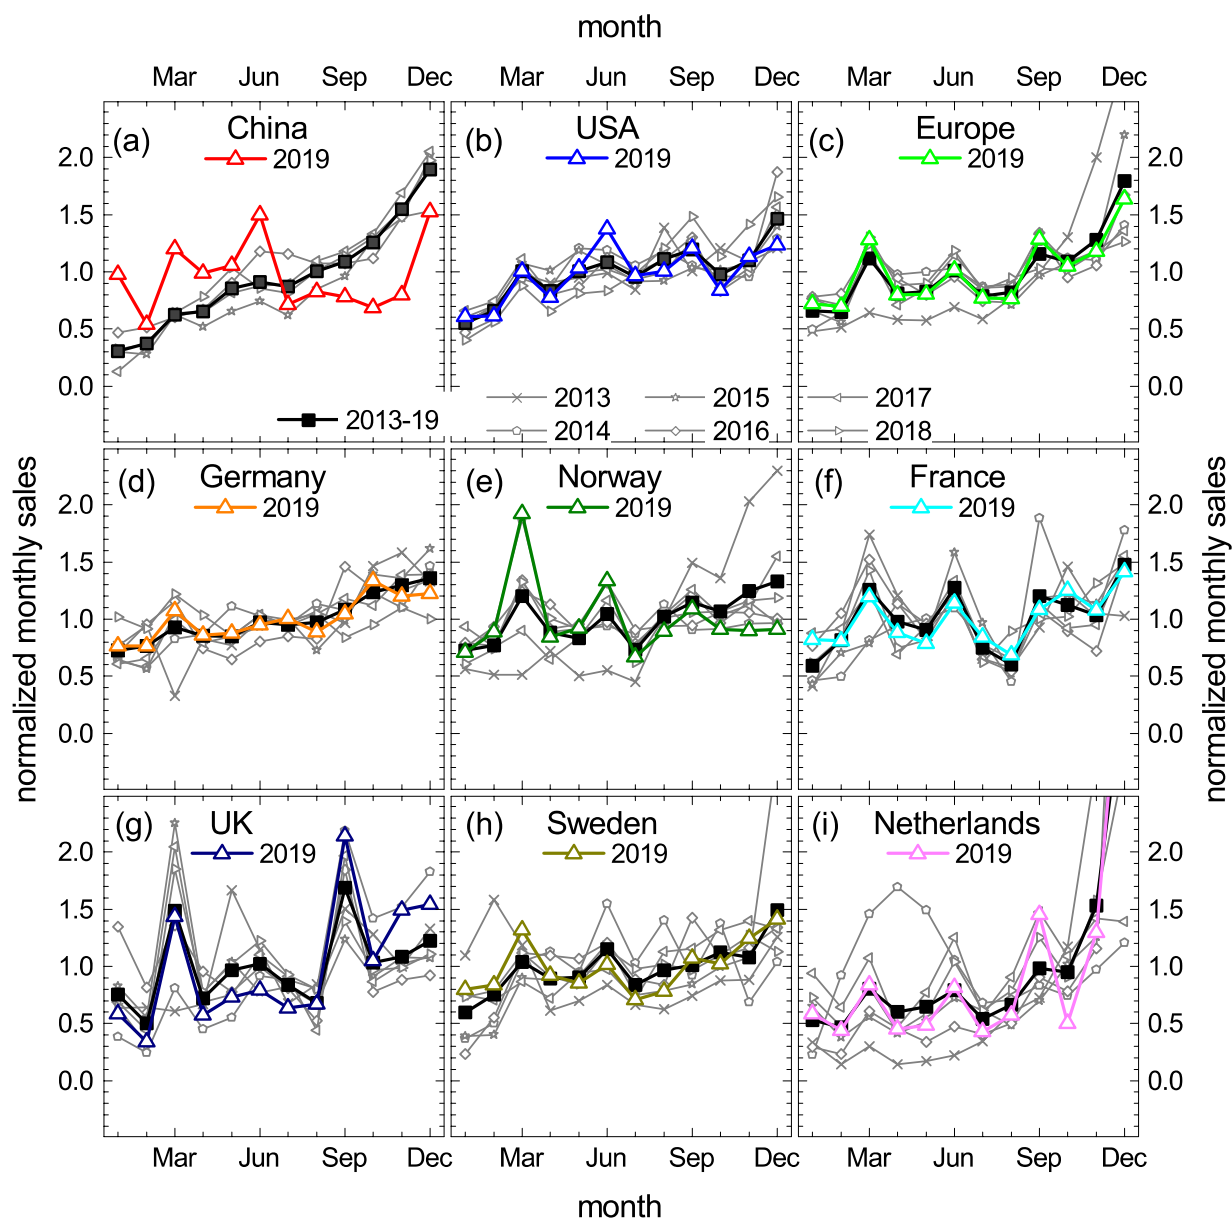

Fig. S2 The error of annual EV sales forecasting using Equation (3).

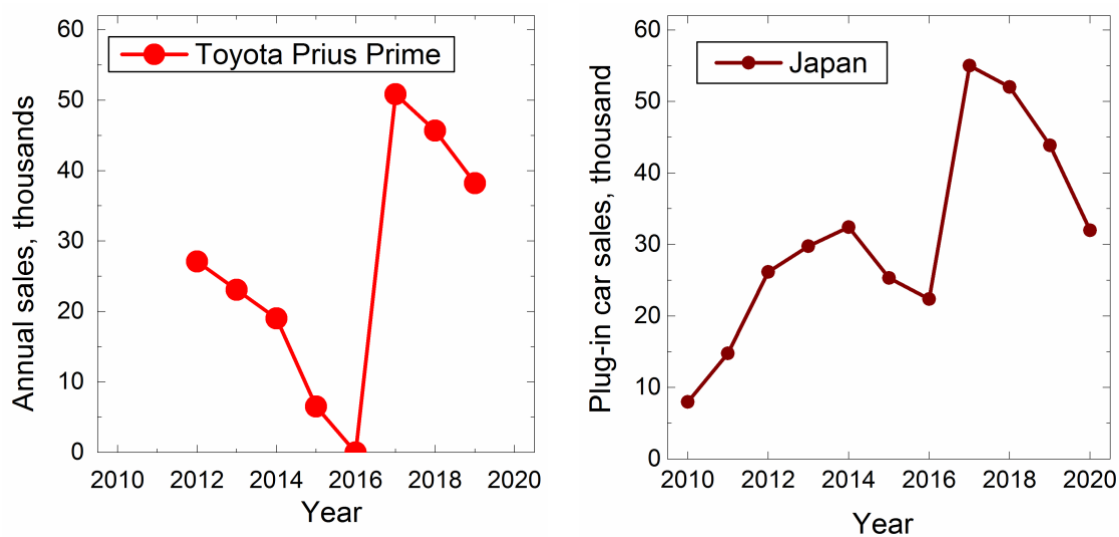

Fig. S3 The comparison of global sales of Toyota Prius Prime and the EV sales in Japan.
